# Supplementary material
Source: Springer Nature journal article supplement (https://www.springermedizin.de/resource/supplementary/12891_2007_594_MOESM1_ESM.pdf/9506296)
Supplement: MOESM1 [file 9506296]

**A**

hip joint  
anteflexion  
moment

 $a_{HIP}$ 

$$M_{HIP} = a_{HIP} \cdot GRF$$

knee joint  
extension  
moment

 $a_{KNEE}$ 

ankle joint  
dorsal flexion  
moment

**GRF****GF**

internal plantar  
flexion moment;  
HC and DPN

**B**

internal knee joint  
extension moment;  
HC and DPN

 $GRF_{HC}$  $GRF_{DPN}$
